# Supplementary material for: Impact of Dietary Sodium Butyrate and Salinomycin on Performance and Intestinal Microbiota in a Broiler Gut Leakage Model
Source: MDPI journal article supplement (doi:10.3390/ani12010111), 2022-01-04
Supplement: s1 [file s1]

**Table S1.** Ingredient and calculated nutrient composition (g/kg) of starter diets (days 1 to 10) and grower diets (days 10 to 35)

| Ingredient (g/kg)                    | Starter |          |             | Grower  |          |             |
|--------------------------------------|---------|----------|-------------|---------|----------|-------------|
|                                      | Control | Butyrate | Salinomycin | Control | Butyrate | Salinomycin |
| Wheat                                | 475.7   | 475.3    | 475.5       | 635.2   | 635.9    | 634.8       |
| Maize                                | 100.0   | 100.0    | 100.0       | -       | -        | -           |
| Rye                                  | -       | -        | -           | 50.0    | 50.0     | 50.0        |
| Soybean meal                         | 285.0   | 285.0    | 285.0       | 213.0   | 213.0    | 213.0       |
| Rape seed (LL)                       | 50.0    | 50.0     | 50.0        | 55.0    | 54.0     | 55.0        |
| Oat                                  | 25.0    | 25.0     | 25.0        | -       | -        | -           |
| Soya oil                             | 15.0    | 15.0     | 15.0        | 10.0    | 10.0     | 10.0        |
| Monocalcium phosphate                | 17.3    | 17.4     | 17.3        | 12.5    | 12.5     | 12.5        |
| Limestone                            | 12.2    | 12.0     | 9.4         | 9.8     | 9.6      | 7.0         |
| Sodium bicarbonate                   | 2.8     | 2.8      | 2.8         | 2.0     | 1.9      | 2.0         |
| Sodium chloride                      | 1.7     | 1.7      | 1.7         | 1.8     | 1.9      | 2.0         |
| DL-methionine                        | 3.6     | 3.6      | 3.6         | 2.9     | 2.9      | 2.9         |
| Lysine HCl                           | 6.0     | 6.0      | 6.0         | 3.0     | 3.0      | 3.0         |
| L-Threonine                          | 2.2     | 2.2      | 2.2         | 1.8     | 1.8      | 1.8         |
| Vitamin and Mineral mix <sup>1</sup> | 3.5     | 3.5      | 3.5         | 3.0     | 3.0      | 3.0         |
| Salinomycin premix <sup>2</sup>      | -       | -        | 3.0         | -       | -        | 3.0         |
| Butyrate coated <sup>3</sup>         |         | 0.5      |             |         | 0.5      |             |
| Calculated nutrients (g/kg)          |         |          |             |         |          |             |
| Dry matter                           | 883.3   | 883.5    | 883.3       | 882.5   | 882.4    | 882.4       |
| Crude protein                        | 224.4   | 224.3    | 224.4       | 200.3   | 200.2    | 200.3       |
| Crude fat                            | 61.2    | 61.3     | 61.2        | 55.5    | 55.2     | 55.5        |
| Ash                                  | 55.9    | 56.0     | 56.3        | 45.9    | 45.9     | 46.3        |
| Starch                               | 346.9   | 346.7    | 346.8       | 386.7   | 387.1    | 386.6       |
| Crude fibre                          | 30.1    | 30.1     | 30.1        | 27.6    | 27.5     | 27.6        |
| Total calcium                        | 9.60    | 9.60     | 9.61        | 7.65    | 7.63     | 7.66        |
| Total phosphorus                     | 7.65    | 7.68     | 7.66        | 6.40    | 6.40     | 6.40        |
| Available phosphorus                 | 4.80    | 4.82     | 4.80        | 3.80    | 3.80     | 3.80        |
| Metabolizable energy (kcal/kg)       | 2859    | 2860     | 2859        | 2876    | 2875     | 2875        |

<sup>1</sup>Supplied per kilogram of starter diet: Vitamin A, 12,000 IU; Vitamin D, 5,000 IU; Vitamin E, 54 IU; Vitamin B12, 0.016 mg; Riboflavin, 6.00 mg; Niacin, 55.00 mg; d-Pantothenic acid, 13.00 mg; Menadione, 2.99 mg; Folic acid, 3.05 mg; Pyroxidine, 4.00 mg; Thiamine, 2.00 mg; Biotin, 0.20 mg; Betaine hydrochloride, 260.00 mg; Manganese dioxide, 120.00 mg; Zinc oxide, 100.00 mg; Iron sulfate, 20.00 mg; Copper sulfate, 18.00 mg; Calcium iodate, 2.00 mg; Sodium selenite, 0.30 mg. The carrier was calcium carbonate.

Supplied per kg of grower diet: Vitamin A, 10,286 IU; Vitamin D, 4,286 IU; Vitamin E, 47 IU; Vitamin B12, 0.013 mg; Riboflavin, 5.14 mg; Niacin, 47.14 mg; d-Pantothenic acid, 11.14 mg; Menadione, 2.57 mg; Folic acid, 2.61 mg; Pyroxidine, 3.43 mg; Thiamine, 1.71 mg; Biotin, 0.17 mg; betaine hydrochloride, 222.86 mg; Manganese dioxide, 102.86 mg; Zinc oxide, 85.71 mg; Iron sulfate, 17.14 mg; Copper sulfate, 15.43 mg; Calcium iodate, 1.71 mg; Sodium selenite, 0.26 mg.

<sup>2</sup> The Salinomycin premix (Sacox®, Huvepharma, Bulgaria) contained calcium carbonate as a carrier and supplied per kg of starter and grower diet 69 mg salinomycin.

<sup>3</sup> The coated butyrate was UltraGuard™-DUO, a combination of protected sodium and calcium butyrate, Devenish, Devenish Nutrition Limited (<https://www.devenishnutrition.com/about/devenish-group/>)
