# Supplementary material for: Impact of Dietary Sodium Butyrate and Salinomycin on Performance and Intestinal Microbiota in a Broiler Gut Leakage Model
Source: MDPI journal article supplement (doi:10.3390/ani12010111), 2022-01-04

**A** Sequencing depth across all samples

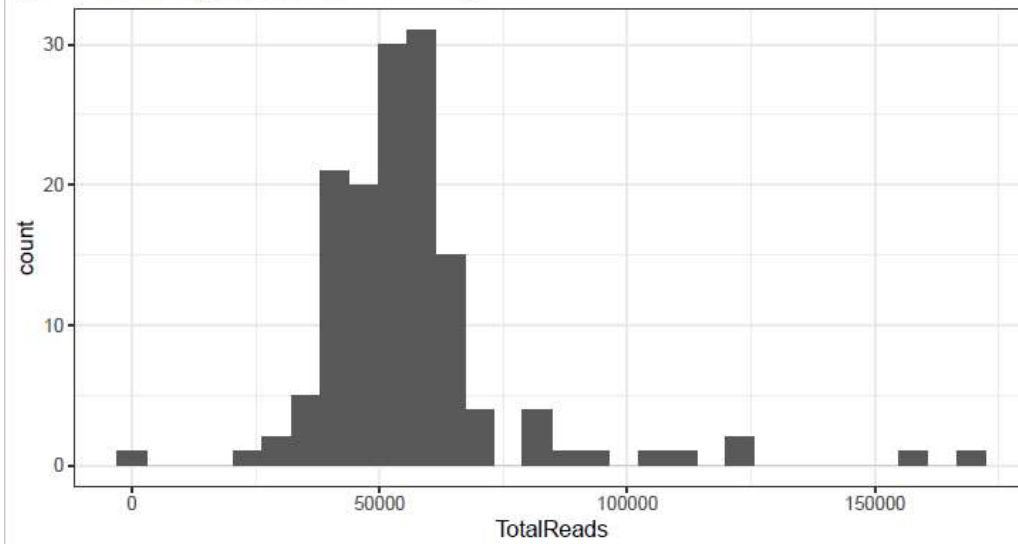

**B** Sequencing depth within each GI segment

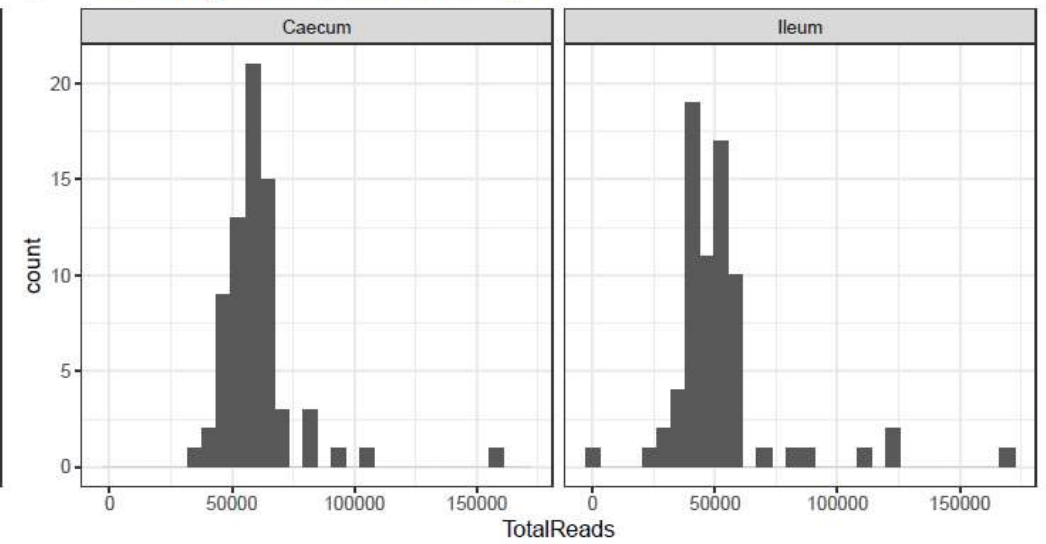

**C** Sequencing depth within Treatment, Caecum

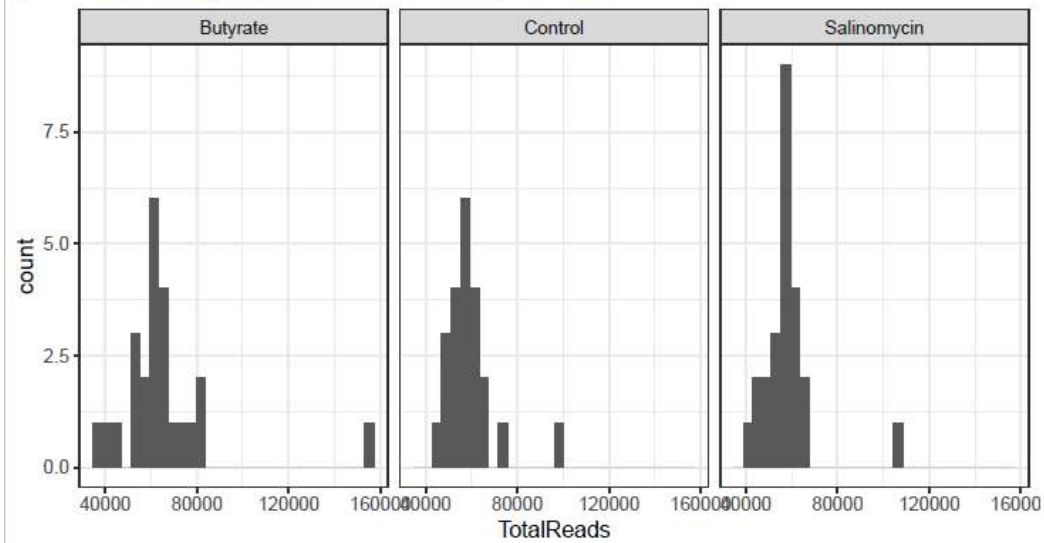

**D** Sequencing depth within Treatment, Ileum

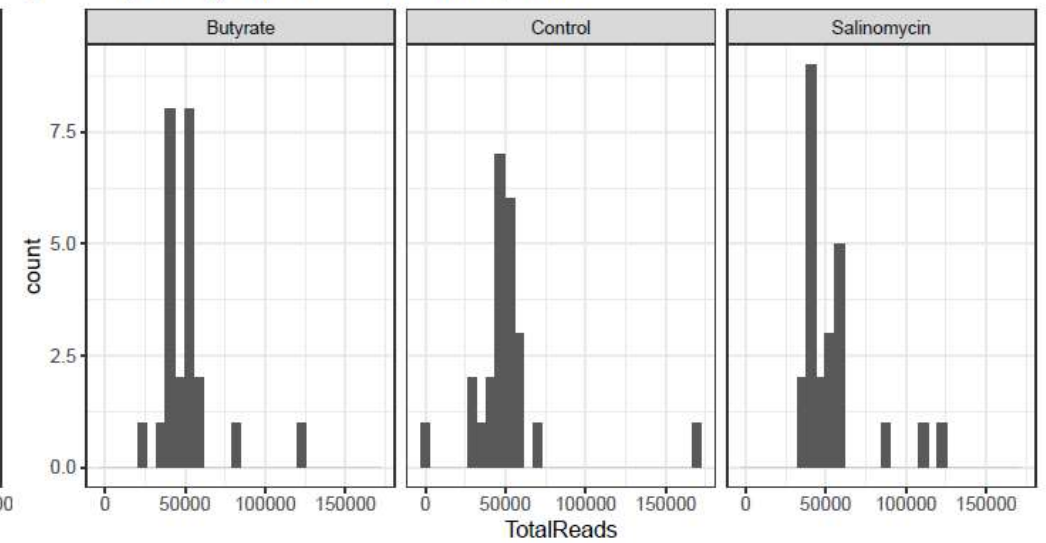

Supplement: s1 [file s1]
