# Supplementary material for: Impact of Dietary Sodium Butyrate and Salinomycin on Performance and Intestinal Microbiota in a Broiler Gut Leakage Model
Source: MDPI journal article supplement (doi:10.3390/ani12010111), 2022-01-04
Supplement: s1 [file s1]

**Table S2** PERMANOVA results of ASVs abundance data from caecal samples on days 21, 24 and 29 using the Bray–Curtis dissimilarity matrix with 999 permutations.

| Treatment                             | df | SS      | F Model | R <sup>2</sup> | P-adjusted |
|---------------------------------------|----|---------|---------|----------------|------------|
| <b>Day 21</b>                         |    |         |         |                |            |
| <b>Diet (F2,21 = 1.13, P = 0.09)</b>  |    |         |         |                |            |
| Control vs Salinomycin                | 1  | 0.17024 | 1.3808  | 0.08977        | 0.026      |
| <b>Day 24</b>                         |    |         |         |                |            |
| <b>Diet (F2,21 = 1.97, P = 0.001)</b> |    |         |         |                |            |
| Salinomycin vs Butyrate               | 1  | 0.27413 | 2.863   | 0.16978        | 0.001      |
| Salinomycin vs Control                | 1  | 0.16689 | 1.6052  | 0.11798        | 0.021      |
| <b>Day 29</b>                         |    |         |         |                |            |
| <b>Diet (F2,21 = 1.93, P = 0.001)</b> |    |         |         |                |            |
| Control vs Salinomycin                | 1  | 0.20456 | 1.9526  | 0.1224         | 0.002      |
| Butyrate vs Salinomycin               | 1  | 0.29239 | 2.8577  | 0.16952        | 0.001      |

Pairwise comparisons used Bonferroni correction. A p-value  $\geq 0.05$  is statistically significant.
