# Supplementary figures and images for: Impact of Dietary Sodium Butyrate and Salinomycin on Performance and Intestinal Microbiota in a Broiler Gut Leakage Model
Source: MDPI journal article supplement (doi:10.3390/ani12010111), 2022-01-04

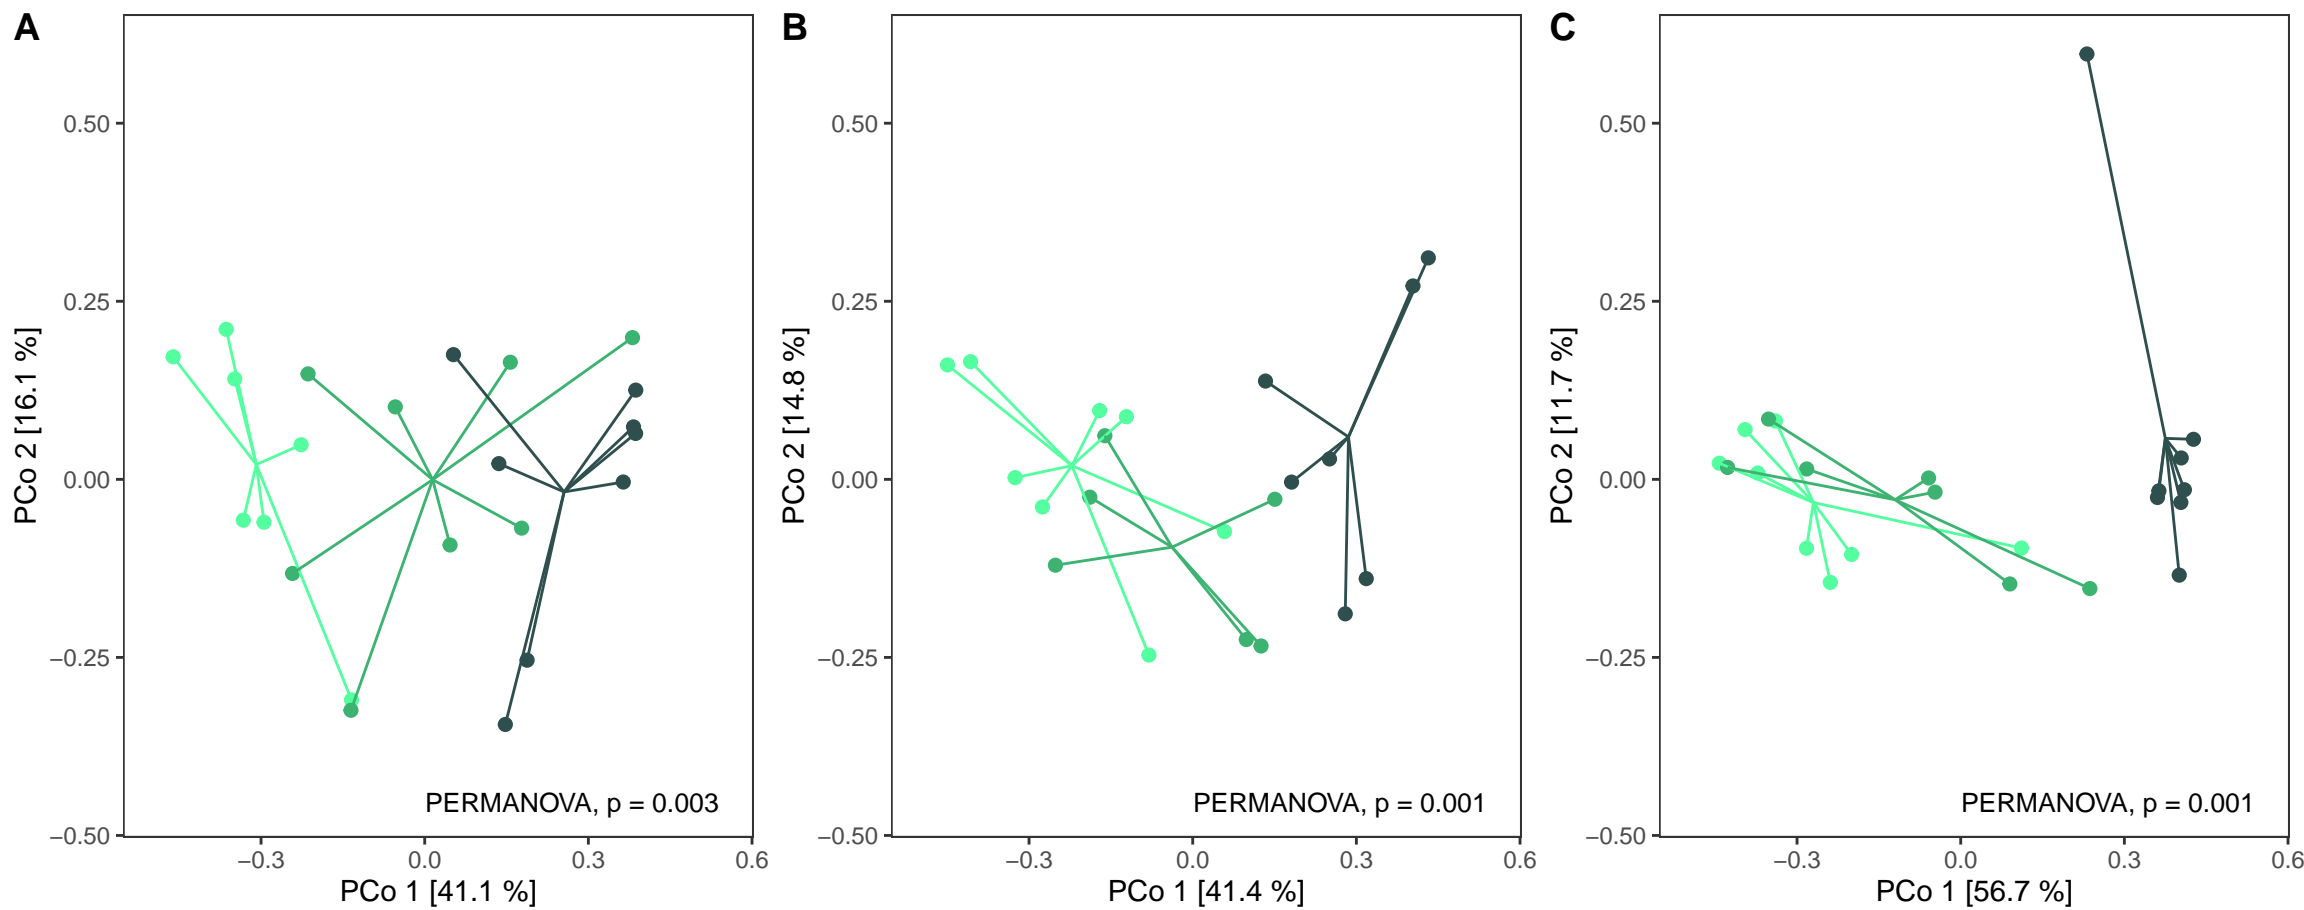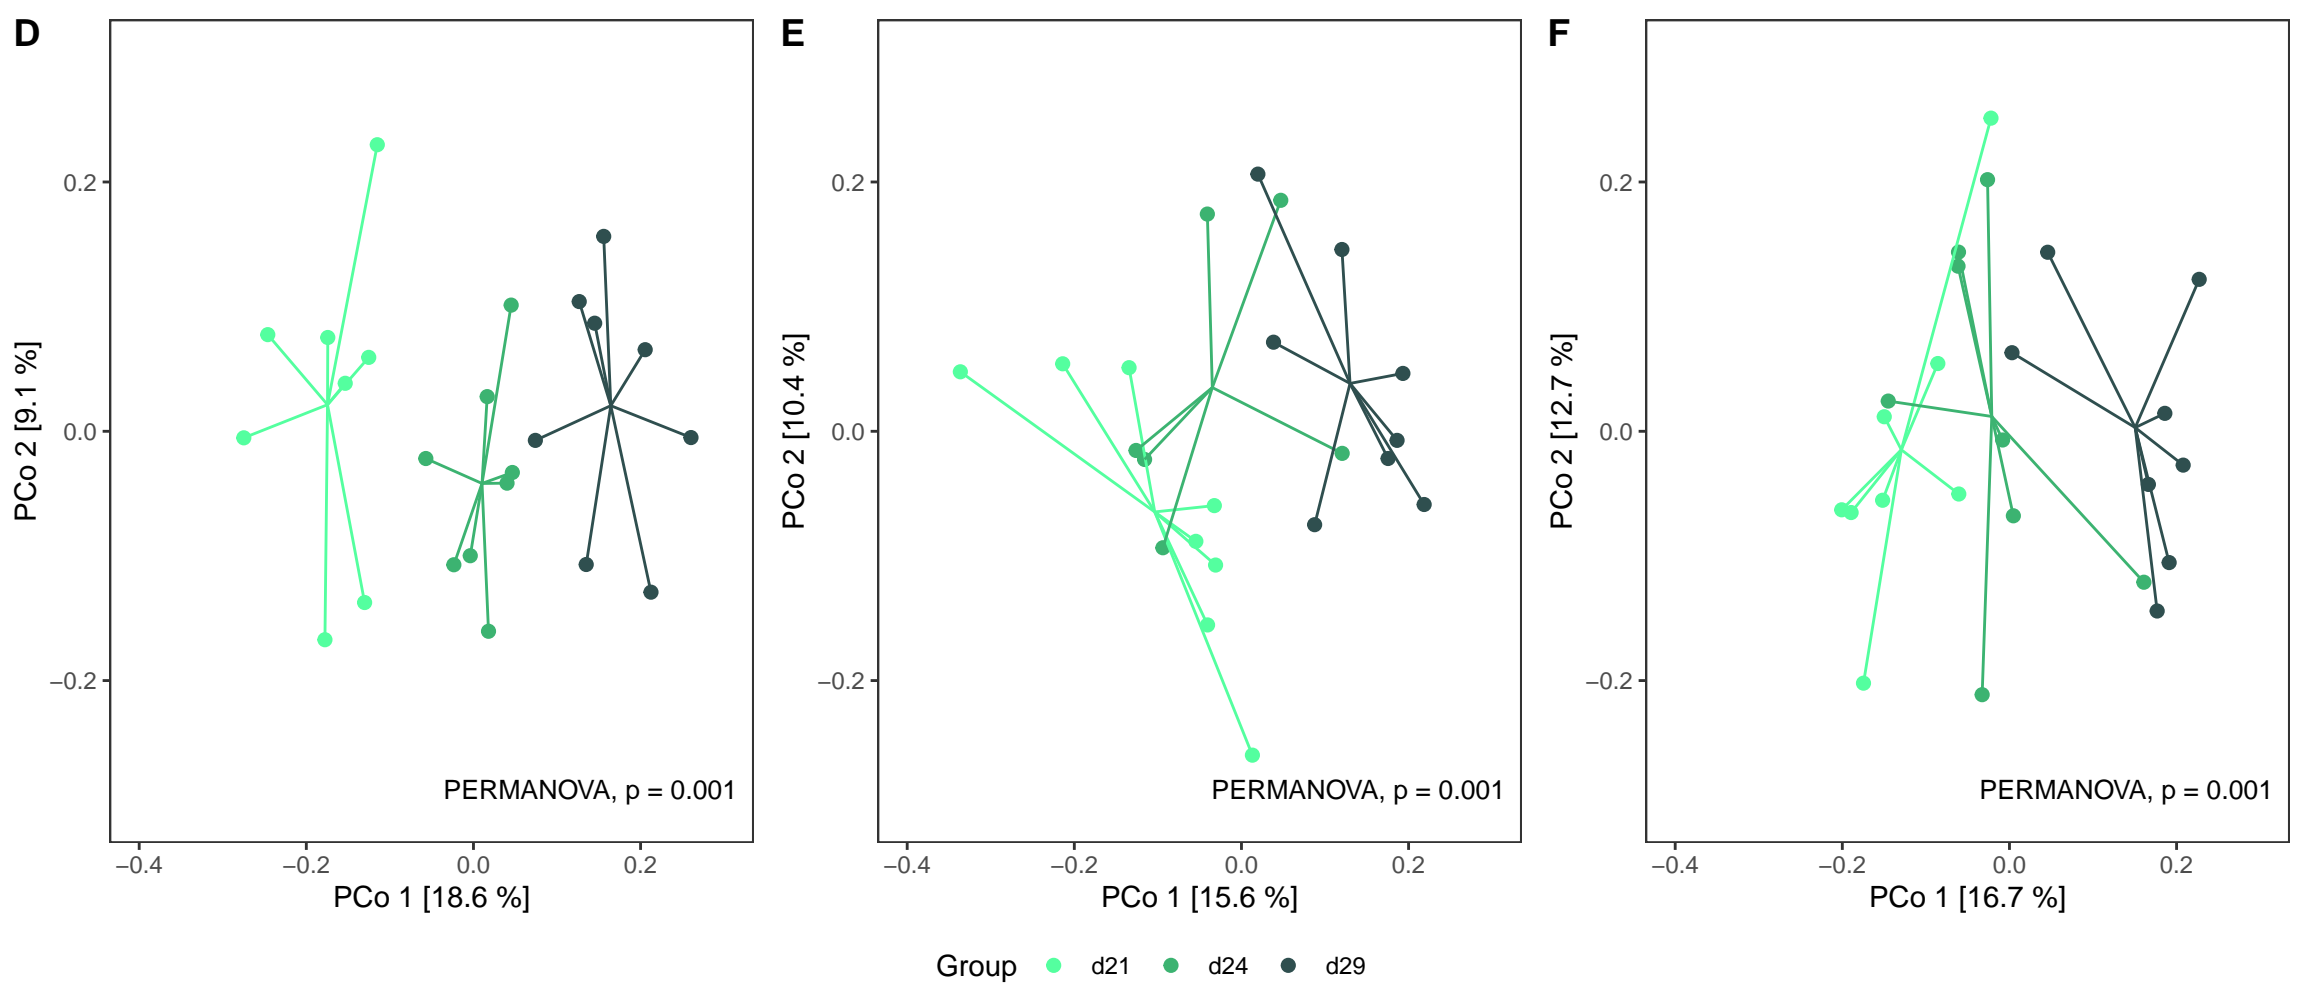

Supplement: s1 [file s1]

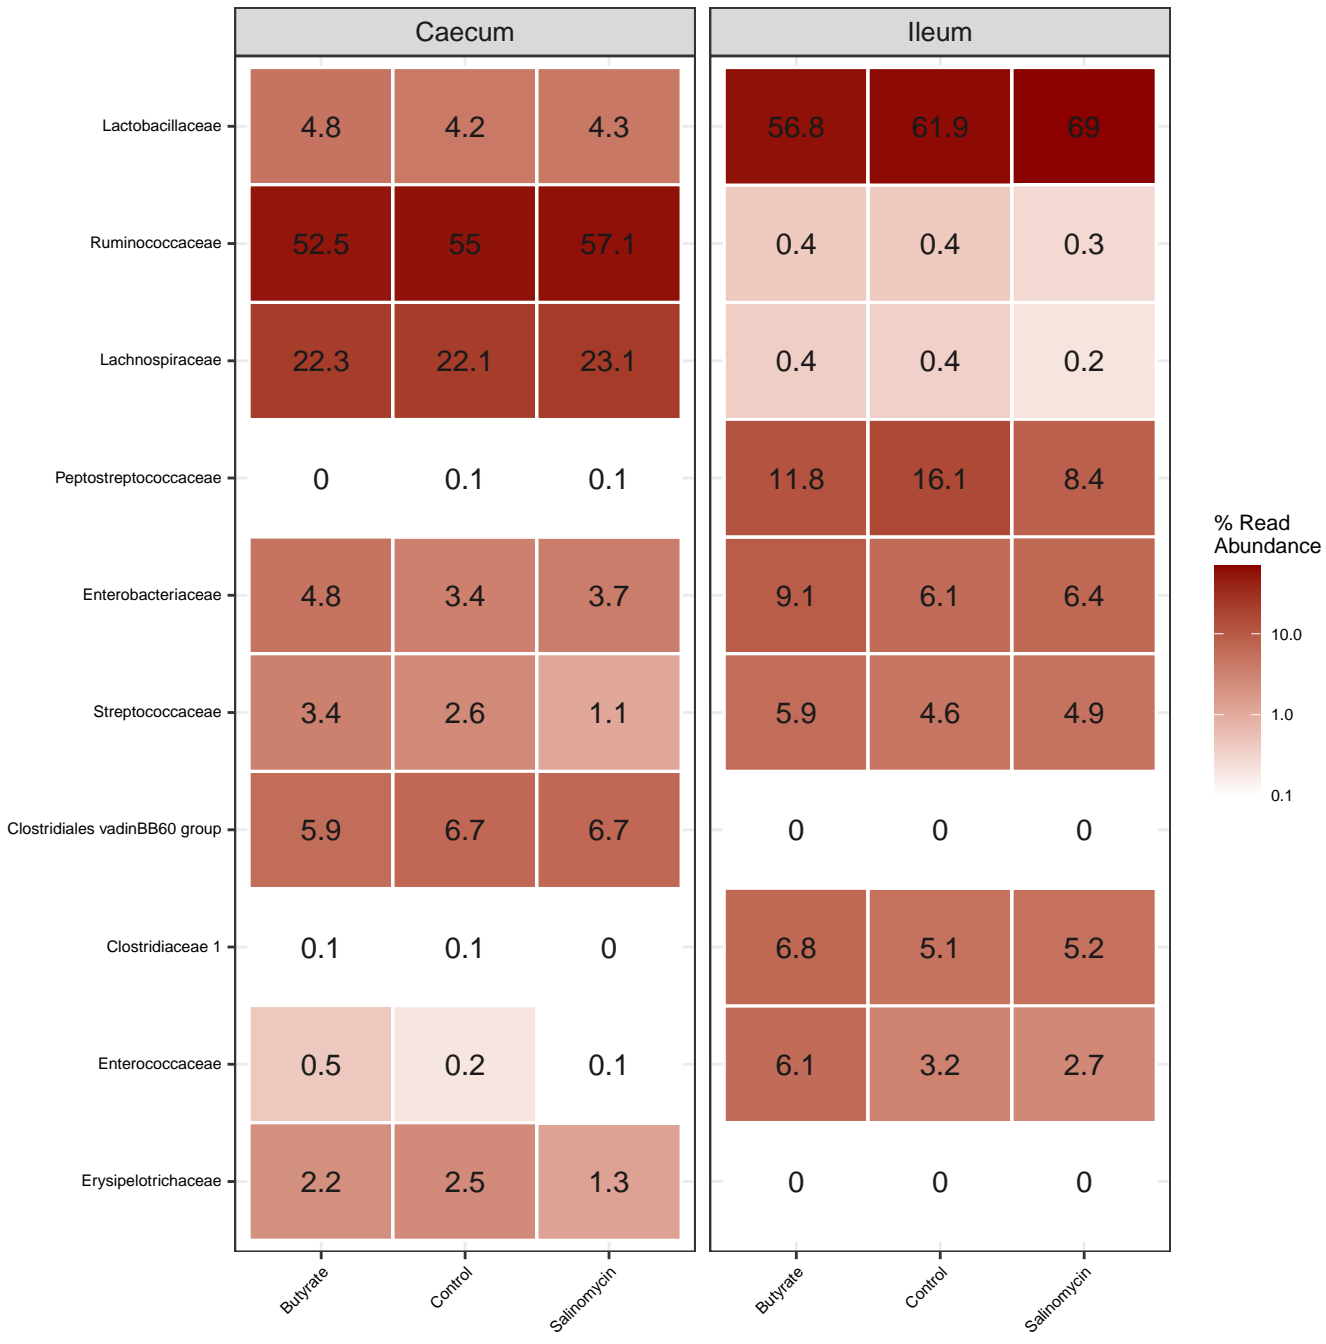

Supplement: s1 [file s1]
